# Supplementary material for: Disproportionate declines of formerly abundant species underlie insect loss
Source: PubMed Central journal article supplement (PMC11006610; doi:10.1038/s41586-023-06861-4), 2023-12-20
Supplement: 41586_2023_6861_MOESM1_ESM.pdf [file 41586_2023_6861_MOESM1_ESM.pdf]

---

**Supplementary information**

---

**Disproportionate declines of formerly abundant species underlie insect loss**

---

In the format provided by the authors and unedited

## Supplementary methods 1

### Search strings

*English* ([www.webofscience.com](http://www.webofscience.com))

ALL=( ("insect" OR "arthropod" OR "invertebrate" OR "beetle\*" OR "butterfl\*" OR "moth\*" OR "flies" OR "bee\*" OR "grasshopper" OR "herbivore" OR "pollinator" OR "mosquito\*") AND ("biomass" OR "abundance" OR "community dynamics" OR "temporal" OR "trend" OR "monitor\*" OR "dynamics" OR "richness" OR "composition") NOT ("Marine") NOT ("Malaria"))

Refined by "long"

*Russian* ([www.elibrary.ru](http://www.elibrary.ru))

(бентос, мезофауна, насекомые, зоопланктон, жесткокрылые, двукрылые, перепончатокрылые, коллембола, чешуекрылые, прямокрылые) + (динамика, многолетний)

*Spanish* ([www.scielo.org](http://www.scielo.org))

(also covering literature in Portuguese, since in this database a Spanish abstract is always provided):

("insecto" OR "insectos" OR "artropodo" OR "artropodos" OR "invertebrado" OR "invertebrados" OR "escarabajo" OR "escabajos" OR "cucarron" OR "cucarrones" OR "mariposa" OR "mariposas" OR "polilla" OR "polillas" OR "moscas" OR "mosca" OR "mosquitos" OR "mosquito" OR "zancudo" OR "zancudos" OR "abeja" OR "abejas" OR "abejorro" OR "abejorros" OR "saltamonte" "saltamontes" OR "grillo" OR "grillos" OR "cucarachas" OR "cucaracha" OR "cigarras" OR "chicharras" OR "cigarra" OR "chicharra" OR "libelulas" OR "hormigas" OR "herbivoro" OR "herbivoros" OR "polinizador" OR "polinizadores" OR "Coleoptera" OR "Diptera" OR "Lepidoptera" OR "Hymenoptera" OR "Odonata" OR "Formicidae" OR "Plecoptera" OR "Trichoptera" OR "Ephemeroptera" ) AND ("biomasa" OR "abundancia" OR "dinamica" OR "temporal" OR "tendencia" OR "monitoreo" OR "riqueza" OR "composicion" OR "diversidad") AND NOT ("malaria" OR "marinos" )

*Chinese*

SU=(‘昆虫’+‘节肢动物’+‘无脊椎动物’+‘龙虱’+‘甲虫’+‘鞘翅目’+‘蝴蝶’+‘蛾’+‘蝇’+‘蜂’+‘蝗虫’+‘草食动物’+‘传粉’+‘蚊’+‘蠓’+‘鞘翅目’+‘双翅目’+‘鳞翅目’+‘膜翅目’+‘蜻蜓目’+‘蚁科’+‘襁翅目’+‘毛翅目’+‘蜉蝣目’) AND SU=(‘群落动态’+‘时间’+‘趋势’+‘监测’+‘动态’+‘丰富度’+‘组成’+‘多样性’) NOT SU=(‘海洋’+‘疟疾’)

Metadata Supplementary Data 1.

Rds file (for R) with the complete data frame from which all analyses can be reproduced. Code for analysis is available on github: <https://github.com/roelvanklink/final-insect-diversity-trends1>

Column explanation:

| Column name     | Explanation                                                                                                                                                                                                                                                                                                                                                                                                                                                                                                                                                                                                                                                                                                                                                                                                                                                                                                                                                                                                                                                                                                                                                                                                                                                                                                                                                                                                                                                          |
|-----------------|----------------------------------------------------------------------------------------------------------------------------------------------------------------------------------------------------------------------------------------------------------------------------------------------------------------------------------------------------------------------------------------------------------------------------------------------------------------------------------------------------------------------------------------------------------------------------------------------------------------------------------------------------------------------------------------------------------------------------------------------------------------------------------------------------------------------------------------------------------------------------------------------------------------------------------------------------------------------------------------------------------------------------------------------------------------------------------------------------------------------------------------------------------------------------------------------------------------------------------------------------------------------------------------------------------------------------------------------------------------------------------------------------------------------------------------------------------------------|
| Plot_ID         | Unique identifier for each site. Always nested in a Datasource_ID                                                                                                                                                                                                                                                                                                                                                                                                                                                                                                                                                                                                                                                                                                                                                                                                                                                                                                                                                                                                                                                                                                                                                                                                                                                                                                                                                                                                    |
| Datasource_ID   | Unique identifier for each dataset. ID's from BioTIME and GPDD were left as is.                                                                                                                                                                                                                                                                                                                                                                                                                                                                                                                                                                                                                                                                                                                                                                                                                                                                                                                                                                                                                                                                                                                                                                                                                                                                                                                                                                                      |
| Datasource_name | Name of Datasource_ID, for ease of recognition. Redundant with Datasource_ID.                                                                                                                                                                                                                                                                                                                                                                                                                                                                                                                                                                                                                                                                                                                                                                                                                                                                                                                                                                                                                                                                                                                                                                                                                                                                                                                                                                                        |
| Year            | Year of sampling event                                                                                                                                                                                                                                                                                                                                                                                                                                                                                                                                                                                                                                                                                                                                                                                                                                                                                                                                                                                                                                                                                                                                                                                                                                                                                                                                                                                                                                               |
| Period          | Time of the year of sampling event (month / season)                                                                                                                                                                                                                                                                                                                                                                                                                                                                                                                                                                                                                                                                                                                                                                                                                                                                                                                                                                                                                                                                                                                                                                                                                                                                                                                                                                                                                  |
| Metric          | <p>Metric of assemblage size. Factor:</p> <ul style="list-style-type: none"> <li>- <i>Abundance</i>: total number of individuals observed per sampling event</li> <li>- <i>Richness</i>: total number of taxa observed per sampling event</li> <li>- <i>rarefiedRichness</i>: number of species expected to be observed per sampling event had the minimum observed number of individuals in any year been found</li> <li>- <i>CoverageRichness.8</i>: Coverage based richness: Expected number of species if 80% of the community had been sampled</li> <li>- <i>Shannon</i>: raw Shannon -Wiener entropy (not yet converted to its Effective Number of Species)</li> <li>- <i>ENSPIE</i>: inverse Simpson index <math>1/\sum p_i^2</math></li> <li>- <i>logNr020</i>: number of species in SAD interval 0 – 20%</li> <li>- <i>logNr2040</i>: number of species in SAD interval 20 – 40%</li> <li>- <i>logNr4060</i>: number of species in SAD interval 40 – 60%</li> <li>- <i>logNr6080</i>: number of species in SAD interval 60 – 80%</li> <li>- <i>logNr80100</i>: number of species in SAD interval 80 – 100%</li> <li>- <i>logNrQ1</i>: Number of species in first SAD quartile (See Fig. S1)</li> <li>- <i>logNrQ2</i>: Number of species in second SAD quartile (See Fig. S1)</li> <li>- <i>logNrQ3</i>: Number of species in third SAD quartile (See Fig. S1)</li> <li>- <i>logNrQ4</i>: Number of species in fourth SAD quartile (See Fig. S1)</li> </ul> |

|                      |                                                                                                 |
|----------------------|-------------------------------------------------------------------------------------------------|
| Number               | Count of insects by any metric observed at this sampling event                                  |
| Realm                | Realm of sampling: here, always Terrestrial                                                     |
| Continent            | Continent at which sampling took place                                                          |
| Region               | Grouping of Countries or states into geographical units providing sufficient data for analysis  |
| Country              | Nation state in which sampling took place                                                       |
| Country_State        | Country or state in which sampling took place (finer scale than Country)                        |
| Location             | Unique identifier of study area or reserve of the sampling event. Not always nested in Dataset. |
| cYear                | variable Year centered around mean for Inla analysis                                            |
| iYear                | Index year for random intercept                                                                 |
| rYear                | Copy of iYear for random slope                                                                  |
| rYear2               | Copy of iYear for random slope                                                                  |
| Period_4INLA         | Unique number for each Period for random intercept in Inla analysis                             |
| Plot_ID_4INLA        | Unique number for each Plot_ID for random intercept in Inla analysis                            |
| Datasource_ID_4INLA  | Unique number for each Datasource_ID for random intercept in Inla analysis                      |
| Location_4INLA       | Unique number for each Location for random intercept in Inla analysis                           |
| Plot_ID_4INLAs       | Unique number for each Plot_ID for random slope in Inla analysis                                |
| Datasource_ID_4INLAs | Unique number for each Datasource_ID for random slope in Inla analysis                          |
| Location_4INLAs      | Unique number for each Location for random slope in Inla analysis                               |

Metadata Supplementary Data 2.

|                      |                                                                                                 |
|----------------------|-------------------------------------------------------------------------------------------------|
| Datasource_ID        | Unique identifier for each dataset. ID's from BioTIME and GPDD were left as is.                 |
| Plot_ID              | Unique identifier for each site. Always nested in a Datasource_ID                               |
| Location             | Unique identifier of study area or reserve of the sampling event. Not always nested in Dataset. |
| Realm                | Realm of sampling: here, always Terrestrial                                                     |
| Year                 | Year of sampling event                                                                          |
| Number               | Number of individuals (or mean number of individuals over iterations) of this taxon             |
| Taxon                | Taxon name as provided in original data source                                                  |
| Level                | Taxonomic level (species, genus, family etc)                                                    |
| Rank                 | Numerical variable for taxonomic level                                                          |
| Phylum               | Phylum                                                                                          |
| Class                | Class                                                                                           |
| Subclass             | Subclass                                                                                        |
| Order                | Order                                                                                           |
| Suborder             | Suborder                                                                                        |
| Family               | Family                                                                                          |
| Subfamily            | Subfamily                                                                                       |
| Genus                | Genus                                                                                           |
| Species              | Specific epithet                                                                                |
| validTaxon           | Incompletely harmonized and updated taxonomic names: Genus + species                            |
| Note                 | Notes or descriptions from original datasets                                                    |
| cYear                | variable Year centered around mean for Inla analysis                                            |
| CGYr1.0              | Initial abundance group, based on year 1 only                                                   |
| CG1.2                | Initial abundance group, based on years 1 and 2                                                 |
| CG1.5                | Initial abundance group, based on years 1 – 5                                                   |
| CGallYrs             | Abundance group, based on all years                                                             |
| iYear                | Index year for random intercept                                                                 |
| rYear                | Copy of iYear for random slope                                                                  |
| rYear2               | Copy of iYear for random slope                                                                  |
| Datasource_ID_4INLA  | Unique number for each Datasource_ID for random intercept in Inla analysis                      |
| Plot_ID_4INLA        | Unique number for each Plot_ID for random intercept in Inla analysis                            |
| Location_4INLA       | Unique number for each Location for random intercept in Inla analysis                           |
| Plot_ID_4INLAs       | Unique number for each Plot_ID for random slope in Inla analysis                                |
| Datasource_ID_4INLAs | Unique number for each Datasource_ID for random slope in Inla analysis                          |
| Location_4INLAs      | Unique number for each Location for random slope in Inla analysis                               |

|                  |                                                                            |
|------------------|----------------------------------------------------------------------------|
| TaxonPlot_4INLA  | Unique number for each within a plot for random intercept in Inla analysis |
| TaxonPlot_4INLAs | Unique number for each within a plot for random slope in Inla analysis     |

Metadata Supplementary Data 3.

|                  |                                                                                                                                                                                                                                                            |
|------------------|------------------------------------------------------------------------------------------------------------------------------------------------------------------------------------------------------------------------------------------------------------|
| Datasource_ID    | Unique identifier for each dataset. ID's from BioTIME and GPDD were left as is.                                                                                                                                                                            |
| Datasource_name  | Name for easier identification of datasets                                                                                                                                                                                                                 |
| Location         | Unique identifier of study area or reserve of the sampling event. Not always nested in Dataset.                                                                                                                                                            |
| Plot_ID          | Unique identifier for each site. Always nested in a Datasource_ID                                                                                                                                                                                          |
| Plot_name        | Unique plot name                                                                                                                                                                                                                                           |
| TaxonPlot_4INLAs | Unique identifier for population (a species in a site)                                                                                                                                                                                                     |
| CGYr1.0          | Initial abundance group in year 1                                                                                                                                                                                                                          |
| Class            | Taxonomic class                                                                                                                                                                                                                                            |
| Order            | Taxonomic order                                                                                                                                                                                                                                            |
| Taxon            | Taxon name as provided in original data source                                                                                                                                                                                                             |
| Level            | Taxonomic level                                                                                                                                                                                                                                            |
| slope            | Mean trend slope of the population, calculated as the model random slope per population + the mean random slopes at the study, location and site levels + correction factor for RtM                                                                        |
| CImin            | Minimum credible interval of trend, calculated the model's lower 90% CI of the population level random slope + the lower 90% CI's of the random slopes at the study, location and site levels + the fixed year effect + correction factor for RtM          |
| CImax            | Maximum credible interval of trend of trend, calculated the model's upper 90% CI of the population level random slope + the upper 90% CI's of the random slopes at the study, location and site levels + the fixed year effect + correction factor for RtM |
| percchange       | Calculated percentage change per year for the trend slope                                                                                                                                                                                                  |
| Population trend | Qualification whether there is at least weak evidence (zero outside the 80% CI of the trend slope):<br>no trend = 80% credible interval overlaps 0<br>>80% certain positive: 0 < than the lower 80% CI<br>>80% certain negative: 0 > than the upper 80% CI |
