# Supplementary material for: Disproportionate declines of formerly abundant species underlie insect loss
Source: PubMed Central journal article supplement (PMC11006610; doi:10.1038/s41586-023-06861-4), 2023-12-20
Supplement: 41586_2023_6861_MOESM3_ESM.pdf [file 41586_2023_6861_MOESM3_ESM.pdf]

**Supplementary Table 1| Data availability of terrestrial insects for various biodiversity metrics.** Discrepancies in data availability between metrics are caused by the possibility of calculating each metric on the available data. For example, some time series may be extremely sparse (have only few species or individuals), and some metrics can only be calculated on integers, which were mostly, but not always available. Abundance and richness data were taken from original publications, also when no underlying data were available.

| Metric                  | Studies | Sites |
|-------------------------|---------|-------|
| Abundance               | 105     | 920   |
| Richness                | 75      | 780   |
| Diversity               | 57      | 551   |
| Rarefied richness       | 53      | 529   |
| Coverage based richness | 51      | 528   |
| SAD intervals           | 57      | 551   |
| Populations             | 56      | 584   |

**Supplementary Table 2| Characteristics of the full dataset at the study level.** The number of taxa is only applicable to datasets reporting full community composition.

|                           | Minimum | Median | Maximum |
|---------------------------|---------|--------|---------|
| Number of sites           | 1       | 3      | 138     |
| Study duration            | 9       | 20     | 64      |
| Number of years with data | 2       | 11     | 53      |
| Start year                | 1951    | 1990   | 2009    |
| End year                  | 1985    | 2011   | 2021    |
| Number of taxa            | 2       | 56.5   | 1757    |

**Supplementary Table 3 | Number of datasets available per continent and biodiversity metric.**

| Metric                | Africa | Asia | Europe | Latin America | North America | Oceania |
|-----------------------|--------|------|--------|---------------|---------------|---------|
| Abundance             | 1      | 13   | 54     | 14            | 18            | 5       |
| Richness              | 0      | 8    | 39     | 10            | 15            | 3       |
| Community composition | 0      | 4    | 27     | 9             | 15            | 2       |

**Supplementary Table 4 | Details on the source data underlying this study.**

| Datasource ID | Taxon                   | Place              | Metrics | Start | End  | Time span | Number of years data | Number of sites | Number of species | url                 | License | Reference     |
|---------------|-------------------------|--------------------|---------|-------|------|-----------|----------------------|-----------------|-------------------|---------------------|---------|---------------|
| 79            | Butterflies             | United Kingdom     | ARC     | 1976  | 1985 | 10        | 10                   | 11              | 39                |                     | c       | <sup>58</sup> |
| 249           | Beetles and moths       | Denmark            | ARC     | 1994  | 2009 | 16        | 16                   | 1               | 1462              | <a href="#">url</a> | d       | <sup>59</sup> |
| 294           | Butterflies             | Vietnam            | ARC     | 2004  | 2013 | 10        | 5                    | 4               | 210               |                     | c       | <sup>47</sup> |
| 301           | Grasshoppers            | USA: Kansas        | ARC     | 1982  | 2018 | 37        | 31                   | 15              | 45                | <a href="#">url</a> | c       | <sup>47</sup> |
| 313           | Grasshoppers            | USA: Minnesota     | ARC     | 1989  | 2006 | 18        | 16                   | 19              | 58                | <a href="#">url</a> | c       | <sup>47</sup> |
| 375           | Beetles                 | Japan              | ARC     | 2005  | 2014 | 10        | 10                   | 22              | 357               |                     | c       | <sup>47</sup> |
| 380           | Butterflies             | United Kingdom     | ARC     | 1978  | 1987 | 10        | 10                   | 1               | 26                |                     | a       | <sup>47</sup> |
| 465           | Moths                   | Czech republic     | ARC     | 1967  | 1992 | 26        | 23                   | 1               | 133               |                     | a       | <sup>46</sup> |
| 502           | Aphids                  | United Kingdom     | ARC     | 1969  | 1990 | 22        | 22                   | 16              | 32                |                     | a       | <sup>46</sup> |
| 1006          | Moths                   | United Kingdom     | ARC     | 1992  | 2015 | 24        | 24                   | 13              | 452               | <a href="#">url</a> | b       | <sup>60</sup> |
| 1102          | Ground beetles          | Netherlands        | ARC     | 1959  | 2019 | 61        | 53                   | 32              | 172               |                     | c       | <sup>22</sup> |
| 1261          | Ants                    | USA: Massachusetts | ARC     | 2003  | 2018 | 16        | 14                   | 4               | 21                | <a href="#">url</a> | c       | <sup>61</sup> |
| 1263          | Butterflies             | United Kingdom     | ARC     | 1993  | 2015 | 23        | 23                   | 13              | 44                | <a href="#">url</a> | b       | <sup>62</sup> |
| 1266          | Froghoppers             | United Kingdom     | ARC     | 1993  | 2015 | 23        | 23                   | 9               | 2                 | <a href="#">url</a> | b       | <sup>63</sup> |
| 1267          | Ground beetles          | United Kingdom     | ARC     | 1993  | 2015 | 23        | 23                   | 47              | 112               | <a href="#">url</a> | b       | <sup>64</sup> |
| 1310          | Plant- and leafhoppers  | Panama             | ARC     | 1974  | 1993 | 20        | 20                   | 1               | 1757              |                     | a       | <sup>65</sup> |
| 1312          | Moths                   | Czech republic     | AR      | 1963  | 1991 | 29        | 29                   | 3               | -                 |                     | a       | <sup>66</sup> |
| 1319          | Grasshoppers            | USA: New Mexico    | ARC     | 1992  | 2013 | 22        | 22                   | 4               | 56                | <a href="#">url</a> | c       | <sup>67</sup> |
| 1324          | Spiders, Ground beetles | Netherlands        | ARC     | 1969  | 2008 | 40        | 39                   | 4               | 211               |                     | a       | <sup>68</sup> |
| 1328          | Hoverflies              | United Kingdom     | ARC     | 1972  | 2001 | 30        | 30                   | 1               | 95                |                     | c       | <sup>22</sup> |
| 1335          | Ladybeetles             | Czech republic     | ARC     | 1983  | 2010 | 28        | 2                    | 3               | 13                |                     | a       | <sup>69</sup> |
| 1339          | Grasshoppers            | USA: Montana       | ARC     | 1986  | 2016 | 31        | 30                   | 4               | 12                | <a href="#">url</a> | a       | <sup>70</sup> |
| 1340          | Moths                   | Hungary            | ARC     | 1962  | 2009 | 48        | 46                   | 7               | 878               | <a href="#">url</a> | d       | <sup>71</sup> |
| 1346          | Ants                    | USA: New Mexico    | ARC     | 1995  | 2005 | 11        | 11                   | 1               | 5                 | <a href="#">url</a> | c       | <sup>72</sup> |
| 1349          | Arthropods              | USA: Arizona       | ARC     | 2006  | 2019 | 14        | 14                   | 23              | 494               | <a href="#">url</a> | c       | <sup>73</sup> |

|      |                                  |                                 |     |      |      |    |    |   |     |                     |   |     |
|------|----------------------------------|---------------------------------|-----|------|------|----|----|---|-----|---------------------|---|-----|
| 1361 | Grasshoppers                     | USA:<br>Georgia                 | ARC | 2000 | 2016 | 17 | 17 | 5 | 5   | <a href="#">url</a> | c | 74  |
| 1365 | Ground beetles                   | USA:<br>Minnesota               | A   | 1980 | 2005 | 26 | 2  | 3 | -   | <a href="#">url</a> | a | 75  |
| 1367 | Ground beetles                   | Italy                           | ARC | 1980 | 2009 | 30 | 4  | 6 | 17  |                     | a | 76  |
| 1377 | Orchidbees                       | Panama                          | ARC | 1980 | 2000 | 21 | 18 | 1 | 35  |                     | a | 77  |
| 1378 | Butterflies                      | Costa Rica                      | A   | 2003 | 2012 | 10 | 10 | 1 | -   |                     | a | 78  |
| 1379 | Butterflies                      | Ecuador                         | A   | 1994 | 2004 | 11 | 11 | 1 | -   |                     | a | 79  |
| 1382 | Terrestrial arthropods           | Chile                           | A   | 2003 | 2014 | 12 | 12 | 1 | -   |                     | a | 80  |
| 1384 | Moths                            | New Zealand                     | AR  | 1962 | 1988 | 27 | 2  | 1 | -   |                     | a | 81  |
| 1385 | Dung beetles and Carrion beetles | Brazil:<br>Amazonas             | A   | 1986 | 2000 | 15 | 2  | 1 | -   |                     | a | 82  |
| 1391 | Soil macroinvertebrates          | Russia:<br>Murmansk             | AR  | 1986 | 2010 | 25 | 3  | 7 | -   |                     | a | 83  |
| 1392 | Butterflies                      | Slovakia                        | ARC | 2001 | 2012 | 12 | 6  | 1 | 57  |                     | a | 84  |
| 1393 | Terrestrial insects              | Russia:<br>Tatarstan            | A   | 1978 | 1995 | 18 | 18 | 3 | -   |                     | a | 85  |
| 1394 | Butterflies                      | Uganda                          | ARr | 2000 | 2011 | 12 | 12 | 1 | -   |                     | a | 86  |
| 1396 | Springtails                      | Germany                         | ARC | 1980 | 2000 | 21 | 9  | 1 | -   |                     | a | 87  |
| 1397 | Ants                             | Hungary                         | A   | 1981 | 2017 | 37 | 28 | 1 | -   |                     | a | 88  |
| 1398 | Beetles                          | Czech republic                  | ARC | 1975 | 2007 | 33 | 7  | 3 | 301 |                     | a | 89  |
| 1400 | Ground beetles                   | Russia:<br>Buryatia             | A   | 1988 | 2007 | 20 | 20 | 4 | -   |                     | a | 90  |
| 1401 | Beetles                          | Russia:<br>Lipetsk Oblast       | AR  | 1995 | 2004 | 10 | 10 | 1 | -   |                     | a | 91  |
| 1403 | Parasitoid wasps                 | Russia:<br>Sverdlovsk Oblast    | A   | 1994 | 2003 | 10 | 4  | 1 | -   |                     | a | 92  |
| 1404 | Arthropods                       | Greenland                       | ARC | 1996 | 2019 | 24 | 23 | 7 | 76  | <a href="#">url</a> | h | 93  |
| 1405 | Saproxyllic beetles              | Finland                         | AR  | 1990 | 1999 | 10 | 10 | 2 | -   |                     | a | 94  |
| 1406 | Arthropods                       | Russia:<br>Orenburg Oblast      | A   | 1990 | 2004 | 15 | 9  | 1 | -   |                     | a | 95  |
| 1407 | Ground beetles                   | Russia: Tver Oblast             | A   | 1996 | 2012 | 17 | 17 | 2 | -   |                     | a | 96  |
| 1411 | Soil fauna                       | Austria                         | A   | 1998 | 2012 | 15 | 2  | 4 | -   |                     | a | 97  |
| 1413 | Soil fauna                       | South Korea                     | AR  | 1998 | 2007 | 10 | 10 | 8 | -   |                     | a | 98  |
| 1416 | Caterpillars                     | USA: New Hampshire              | A   | 1986 | 1997 | 12 | 11 | 3 | -   | <a href="#">url</a> | h | 99  |
| 1419 | Ants                             | Australia:<br>Western Australia | ARC | 1980 | 1997 | 18 | 2  | 3 | 47  |                     | a | 100 |
| 1434 | Spiders                          | Switzerland                     | A   | 1994 | 2004 | 11 | 11 | 1 | -   |                     | a | 101 |
| 1445 | Ants                             | USA: Arizona                    | ARC | 1977 | 2009 | 33 | 28 | 2 | 21  |                     | d | 102 |
| 1446 | Ground beetles                   | Russia:<br>Kursk Oblast         | A   | 1983 | 1999 | 17 | 17 | 3 | -   |                     | a | 103 |
| 1458 | Springtails                      | Russia:<br>Novgorod Oblast      | AR  | 1981 | 1995 | 15 | 5  | 3 | -   |                     | a | 104 |

|      |                                           |                          |     |      |      |    |    |    |     |                     |          |     |
|------|-------------------------------------------|--------------------------|-----|------|------|----|----|----|-----|---------------------|----------|-----|
| 1459 | Ground beetles                            | Russia: Moscow Oblast    | ARC | 1974 | 1990 | 17 | 6  | 2  | 24  | a                   | 105      |     |
| 1460 | Rove beetles                              | Russia: Leningrad Oblast | AR  | 1983 | 2005 | 23 | 4  | 1  | -   | a                   | 106      |     |
| 1461 | Hoverflies                                | Russia: Khabarovsk Krai  | A   | 1988 | 2013 | 26 | 5  | 1  | -   | a                   | 107      |     |
| 1462 | Butterflies                               | Russia: Primorsky Krai   | A   | 1986 | 2005 | 20 | 20 | 1  | -   | a                   | 108      |     |
| 1464 | Parasitoid wasps                          | Belarus                  | AR  | 1990 | 2000 | 11 | 11 | 1  | -   | a                   | 109      |     |
| 1465 | Moths                                     | Malaysia                 | AR  | 1965 | 2007 | 43 | 2  | 5  | -   | a                   | 110      |     |
| 1467 | Hymenoptera                               | Belarus                  | A   | 1986 | 2003 | 18 | 16 | 1  | -   | a                   | 111      |     |
| 1468 | Bumblebees                                | Spain                    | ARC | 1988 | 2008 | 21 | 2  | 1  | 24  | a                   | 112      |     |
| 1470 | Cuckoo wasps                              | Belarus                  | A   | 1985 | 2005 | 21 | 21 | 1  | -   | a                   | 113      |     |
| 1471 | Beetles                                   | Ukraine                  | A   | 2003 | 2011 | 9  | 9  | 1  | -   | a                   | 114      |     |
| 1472 | Moths                                     | Hungary                  | AR  | 1990 | 2004 | 15 | 8  | 1  | -   | a                   | 115      |     |
| 1474 | Grasshoppers bugs, plant- and leafhoppers | Germany                  | ARC | 1951 | 2009 | 59 | 2  | 9  | 196 | c                   | 116      |     |
| 1475 | Plant and leafhoppers                     | Germany                  | ARC | 1963 | 2010 | 48 | 7  | 27 | 179 | c                   | 117      |     |
| 1476 | Butterflies                               | USA: Wisconsin           | ARC | 1990 | 2020 | 31 | 31 | 53 | 86  | a                   | 18       |     |
| 1477 | Butterflies                               | USA: Wisconsin           | ARC | 1988 | 2021 | 34 | 33 | 45 | 121 | a                   | 18       |     |
| 1478 | Butterflies                               | USA: Wisconsin           | ARC | 1990 | 2021 | 32 | 32 | 35 | 101 | a                   | 18       |     |
| 1479 | Arthropods                                | Australia: Tasmania      | A   | 1999 | 2015 | 17 | 9  | 6  | -   | c                   | 18       |     |
| 1480 | Arthropods                                | Australia: Tasmania      | A   | 2001 | 2012 | 12 | 4  | 14 | -   | c                   | 18       |     |
| 1481 | Butterflies                               | Israel                   | A   | 2009 | 2018 | 10 | 10 | 10 | -   | c                   | 118      |     |
| 1487 | Arthropods                                | Puerto Rico              | ARC | 1991 | 2016 | 26 | 15 | 30 | 167 | a                   | 119      |     |
| 1493 | Flying insects                            | United Kingdom           | A   | 2000 | 2009 | 10 | 10 | 1  | -   | a                   | 120      |     |
| 1494 | Sawflies                                  | United Kingdom           | A   | 1970 | 1988 | 19 | 19 | 5  | -   | a                   | 121      |     |
| 1496 | Flying insects                            | United Kingdom           | A   | 1972 | 1998 | 27 | 27 | 1  | -   | a                   | 122      |     |
| 1497 | Ladybeetles                               | United Kingdom           | A   | 2006 | 2016 | 11 | 11 | 4  | -   | a                   | 123      |     |
| 1501 | Butterflies                               | Ireland                  | ARC | 1992 | 2016 | 25 | 16 | 2  | 25  | <a href="#">url</a> | c        | 124 |
| 1502 | Ground beetles                            | China: Hebei             | ARC | 1997 | 2014 | 18 | 2  | 3  | 44  | a                   | 125      |     |
| 1505 | Mining and galling insects                | Finland                  | ARC | 2003 | 2013 | 11 | 11 | 1  | 21  | d                   | 126, 127 |     |
| 1512 | Ground beetles                            | Germany                  | Rr  | 1994 | 2017 | 24 | 24 | 1  | -   | a                   | 128      |     |
| 1515 | Dung beetles                              | Spain                    | ARC | 1983 | 2017 | 35 | 2  | 1  | 50  | a                   | 129      |     |
| 1516 | Saproxyllic beetles                       | Sweden                   | AR  | 2001 | 2013 | 13 | 3  | 2  | -   | a                   | 130      |     |

|      |                                                                                  |                                  |     |      |      |    |    |     |      |                     |             |
|------|----------------------------------------------------------------------------------|----------------------------------|-----|------|------|----|----|-----|------|---------------------|-------------|
| 1518 | Butterflies                                                                      | USA: Ohio                        | A   | 1996 | 2016 | 21 | 21 | 58  | -    | c                   | 18,<br>131  |
| 1521 | Springtails                                                                      | Denmark                          | AR  | 1985 | 1999 | 15 | 8  | 2   | -    | a                   | 132         |
| 1524 | Flying insects                                                                   | Netherlands                      | A   | 1997 | 2017 | 21 | 21 | 1   | -    | a                   | 133         |
| 1528 | Moths                                                                            | Finland                          | AR  | 1993 | 2012 | 20 | 20 | 54  | -    | <a href="#">url</a> | 134,<br>135 |
| 1530 | Ants                                                                             | Brazil:<br>Amazonas              | AR  | 2006 | 2014 | 9  | 2  | 1   | -    | a                   | 136         |
| 1531 | Dung beetles                                                                     | Brazil: Mato<br>Grosso do<br>Sul | ARC | 1990 | 2015 | 26 | 26 | 1   | 40   | a                   | 137         |
| 1533 | Bees                                                                             | Brazil:<br>Parana                | ARC | 1955 | 2018 | 64 | 2  | 15  | 28   | a                   | 138         |
| 1535 | Bees                                                                             | Brazil: Sao<br>Paulo             | ARC | 1990 | 2018 | 29 | 3  | 1   | 11   | a                   | 139         |
| 1539 | Beetles                                                                          | USA: New<br>Hampshire            | ARC | 1973 | 2017 | 45 | 8  | 3   | 42   | c                   | 140         |
| 1541 | Butterflies                                                                      | Panama                           | ARC | 2009 | 2017 | 9  | 9  | 1   | 288  | d                   | 141,<br>142 |
| 1543 | Flying insects                                                                   | China:<br>Shandong               | ARD | 2003 | 2017 | 15 | 15 | 1   | -    | a                   | 143         |
| 1544 | Ants                                                                             | Australia:<br>Queensland         | ARC | 1992 | 2013 | 22 | 19 | 10  | 99   | <a href="#">url</a> | 144,<br>145 |
| 1547 | Moths                                                                            | South Korea                      | ARC | 2005 | 2017 | 13 | 13 | 6   | 1038 | <a href="#">url</a> | 146,<br>147 |
| 1548 | Ground<br>beetles                                                                | Finland                          | ARC | 1995 | 2006 | 12 | 5  | 3   | 21   | a                   | 148         |
| 1549 | Moths                                                                            | United<br>Kingdom                | ARC | 1993 | 2013 | 21 | 21 | 1   | 373  | a                   | 149         |
| 1550 | Spiders,<br>beetles,<br>grasshoppers,<br>true bugs,<br>plant- and<br>leafhoppers | Germany                          | AR  | 2008 | 2017 | 10 | 10 | 138 | -    | e                   | 5           |
| 1558 | Calyptrate flies                                                                 | China: Hubei                     | ARD | 2006 | 2016 | 11 | 11 | 4   | -    | a                   | 150         |
| 1560 | Bees                                                                             | Brazil:<br>Parana                | ARC | 1981 | 2015 | 35 | 2  | 1   | 154  | a                   | 151         |
| 1561 | Bees                                                                             | Brazil:<br>Parana                | ARC | 1962 | 2004 | 43 | 3  | 1   | 55   | a                   | 152         |
| 1562 | Aphids                                                                           | USA: US<br>Midwest               | ARC | 2006 | 2019 | 14 | 14 | 33  | 81   | d                   | 153         |

#### Open access licenses:

- a. PD: public domain (all data extracted from papers)
- b. OGL: [Open Government License](#) (UK)
- c. CC-BY
- d. CC0
- e. CC-BY-NC
- f. CC-BY-ND
- g. ODC: [Open Data Commons](#)
- h. no shar: data openly accessible, but no redistribution of data or derived products is allowed

More detailed metadata are available in the data repository on the Knowledge Network Biocomplexity<sup>20</sup> and in<sup>16</sup>.

Metrics: A: Abundance, R: Richness, C: Community composition and evenness, Rr: Rarefied richness, D = Diversity (Shannon / Simpson)



**Supplementary Table 5 | Correction factors for regression-to-the-mean**, calculated as the difference between the mean slope estimate of all available years, and the dataset censored by the first or the first three years.

| Initial abundance interval | 1-year censoring | 3-year censoring |
|----------------------------|------------------|------------------|
| <20%                       | -0.00136         | -0.00339         |
| 20-40%                     | 0.00372          | 0.00977          |
| 40-60%                     | 0.01065          | 0.01863          |
| 60-80%                     | 0.01366          | 0.01968          |
| 80-100%                    | 0.01251          | 0.01829          |
